# Supplementary material for: Behavioral stress alters corticolimbic microglia in a sex- and brain region-specific manner
Source: PubMed Central journal article supplement (PMC5711022; doi:10.1371/journal.pone.0187631), 2017-12-01
Supplement: pone.0187631.s002.pdf [file pone.0187631.s002.pdf]

**Supplementary Table 1. Pearson correlation coefficients: adrenal-weight-to-body-weight ratios, microglial density, and microglial morphology.**

|                |        | Microglial Density |       |      |       |       | Microglial Morphology |       |       |       |       |
|----------------|--------|--------------------|-------|------|-------|-------|-----------------------|-------|-------|-------|-------|
|                |        | OFC                | mPFC  | BLA  | CA3-R | CA3-O | OFC                   | mPFC  | BLA   | CA3-R | CA3-O |
| Adrenal Weight | Male   | -0.31              | -0.01 | 0.05 | -0.01 | 0.08  | -0.26                 | 0.14  | -0.14 | -0.34 | -0.34 |
|                | Female | <b>-0.45</b>       | -0.12 | 0.04 | -0.32 | -0.15 | 0.22                  | -0.19 | -0.08 | -0.21 | -0.01 |

*Note:* Associations between adrenal-weight-to-body-weight ratios, microglial density, and microglial morphology were examined in unstressed and chronic stress male (n = 25-27 / analysis) and female (n = 20-21 / analysis) rats using Pearson correlation coefficients. Values are presented above, with significant associations marked in bold ( $p \leq 0.05$ ).
