# Supplementary material for: Behavioral stress alters corticolimbic microglia in a sex- and brain region-specific manner
Source: PubMed Central journal article supplement (PMC5711022; doi:10.1371/journal.pone.0187631), 2017-12-01
Supplement: pone.0187631.s003.pdf [file pone.0187631.s003.pdf]

**Supplementary Table 2. Pearson correlation coefficients: microglial morphology across corticolimbic circuitry.**

|                          |       | Microglial Morphology |             |              |             |       |
|--------------------------|-------|-----------------------|-------------|--------------|-------------|-------|
|                          |       | OFC                   | mPFC        | BLA          | CA3-R       | CA3-O |
| Unstressed<br>Male       | OFC   | 1                     |             |              |             |       |
|                          | mPFC  | 0.3                   | 1           |              |             |       |
|                          | BLA   | <b>0.82</b>           | <b>0.82</b> | 1            |             |       |
|                          | CA3-R | 0.45                  | <b>0.67</b> | <b>0.67</b>  | 1           |       |
|                          | CA3-O | <b>0.67</b>           | <b>0.74</b> | <b>0.6</b>   | <b>0.76</b> | 1     |
| Acute Stress<br>Male     | OFC   | 1                     |             |              |             |       |
|                          | mPFC  | 0.33                  | 1           |              |             |       |
|                          | BLA   | 0.1                   | -0.3        | 1            |             |       |
|                          | CA3-R | <b>-0.54</b>          | 0.24        | -0.31        | 1           |       |
|                          | CA3-O | <b>-0.63</b>          | 0.11        | -0.46        | <b>0.8</b>  | 1     |
| Chronic Stress<br>Male   | OFC   | 1                     |             |              |             |       |
|                          | mPFC  | 0.08                  | 1           |              |             |       |
|                          | BLA   | -0.28                 | 0.01        | 1            |             |       |
|                          | CA3-R | -0.28                 | -0.01       | -0.08        | 1           |       |
|                          | CA3-O | -0.38                 | -0.05       | -0.11        | <b>0.94</b> | 1     |
| Unstressed<br>Female     | OFC   | 1                     |             |              |             |       |
|                          | mPFC  | 0.31                  | 1           |              |             |       |
|                          | BLA   | -0.29                 | -0.08       | 1            |             |       |
|                          | CA3-R | -0.1                  | 0.48        | <b>0.63</b>  | 1           |       |
|                          | CA3-O | 0.15                  | 0.54        | 0.56         | <b>0.87</b> | 1     |
| Acute Stress<br>Female   | OFC   | 1                     |             |              |             |       |
|                          | mPFC  | 0.39                  | 1           |              |             |       |
|                          | BLA   | -0.39                 | -0.23       | 1            |             |       |
|                          | CA3-R | 0.28                  | -0.02       | <b>-0.63</b> | 1           |       |
|                          | CA3-O | 0.01                  | -0.06       | -0.51        | <b>0.82</b> | 1     |
| Chronic Stress<br>Female | OFC   | 1                     |             |              |             |       |
|                          | mPFC  | <b>0.67</b>           | 1           |              |             |       |
|                          | BLA   | <b>0.83</b>           | <b>0.69</b> | 1            |             |       |
|                          | CA3-R | 0.2                   | 0.2         | -0.11        | 1           |       |
|                          | CA3-O | 0.58                  | 0.42        | <b>0.71</b>  | 0.41        | 1     |

Note: Microglial morphology was examined across corticolimbic circuitry in male (n = 12-14 / group) and female (n = 10-11 / group) rats using Pearson correlation coefficients. Values are presented above, with significant associations marked in bold ( $p \leq 0.05$ ).
